# Supplementary material for: Association of Diabetes and Cancers: An analysis of the Healthcare Cost and Utilization Project National Inpatient Sample (HCUP-NIS) 2005-2015 Dataset
Source: Research Square preprint supplement (doi:10.21203/rs.3.rs-7414347/v1), 2025-09-17
Supplement: Supplementary file 1 [file 5c98f83aa1c9f1a306ee6b0c.docx]

**Supplementart file 2**

| **Table S2** Multivariable logistic regression of association (Odds Ratio) between diabetes and total cancers (as the reason of admission or as comorbities) adjusted by age, sex, race, smoking, alcohol and obesity in hospitalized inpatient in US, 2004-2015 | | | | | | | | | | | | | |
| --- | --- | --- | --- | --- | --- | --- | --- | --- | --- | --- | --- | --- | --- |
| **Predictors**  **Cancers** | **All Diadetes** | Age | Sex | Smoking | Alcohol | Obesity | Race | | | | | | Cons. |
| White | Black | Hispanic | Asian or Pacific | Native American | Other |
| Head and neck | 0.58 | 0.99 | 0.36 | 1.1 | 1.20 | 0.38 | 1 | 0.93 | 0.76 | 1.05 | 0.74 | 0.88 | 0.03 |
| Esophagus | 0.65 | 0.99 | 0.27 | 0.85 | 0.98 | 0.36 | 1 | 0.81 | 0.64 | 0.75 | 0.80 | 0.69 | .009 |
| Stomach | 0.72 | 1.00 | 0.52 | 0.75 | 0.63 | 0.47 | 1 | 1.77 | 2.09 | 4.30 | 1.26 | 1.73 | .002 |
| Colon | 0.88 | 1.02 | 0.81 | 0.76 | 0.65 | 0.82 | 1 | 1.02 | 0.85 | 1.07 | 0.82 | 0.88 | .003 |
| Rectum and anus | 0.67 | 0.98 | 0.82 | 0.82 | 0.48 | 0.62 | 1 | 0.78 | 0.91 | 1.41 | 0.86 | 0.92 | .025 |
| Liver, intrahepatic | 1.20 | 0.97 | 0.46 | 0.72 | 3.01 | 0.50 | 1 | 1.15 | 2.03 | 4.42 | 1.27 | 1.58 | .019 |
| Pancreas | 1.42 | 0.99 | 0.85 | 0.73 | 0.61 | 0.36 | 1 | 0.99 | 0.88 | 1.03 | 0.66 | 0.99 | .008 |
| GI peritoneum | 0.94 | 0.99 | 1.02 | 0.60 | 0.55 | 0.56 | 1 | 0.90 | 1.10 | 1.60 | 0.88 | 1.05 | .005 |
| Lung, Bronchus | 0.73 | 1.00 | 0.79 | 1.73 | 0.58 | 0.47 | 1 | 0.87 | 0.52 | 0.95 | 0.68 | 0.71 | .031 |
| Other respiratory tissue | 0.62 | 1.00 | 0.42 | 0.84 | 0.59 | 0.49 | 1 | 0.57 | 0.71 | 0.95 | 0.57 | 0.88 | .000 |
| Bone tissue | 0.59 | 0.97 | 0.73 | 0.52 | 0.38 | 0.61 | 1 | 0.86 | 1.06 | 1.37 | 0.78 | 1.03 | .012 |
| Skin, Melanomas | 0.73 | 1.00 | 0.58 | 0.68 | 0.61 | 1.00 | 1 | 0.06 | 0.24 | 0.13 | 0.31 | 0.44 | .005 |
| Skin, non-epithelial | 0.79 | 1.03 | 0.57 | 1.00 | 0.81 | 1.12 | 1 | 0.07 | 0.27 | 0.15 | 0.29 | 0.45 | .001 |
| Breast | 0.85 | 1.00 | - | 0.70 | 0.69 | 0.80 | 1 | 0.82 | 0.67 | 0.81 | 0.66 | 0.81 | .054 |
| Uterus | 0.92 | 0.98 | - | 0.59 | 0.44 | 1.73 | 1 | 0.71 | 0.79 | 1.02 | 0.71 | 0.88 | .025 |
| Cervix | 0.76 | 0.96 | - | 1.46 | 0.70 | 0.84 | 1 | 0.92 | 1.18 | 1.29 | 0.92 | 0.98 | .070 |
| Ovary | 0.62 | 0.97 | - | 0.54 | 0.37 | 0.66 | 1 | 0.58 | 0.79 | 1.09 | 0.76 | 0.84 | .084 |
| Other female cancers | 0.87 | 0.99 | - | 1.15 | 0.62 | 0.95 | 1 | 0.63 | 0.72 | 0.67 | 0.76 | 0.82 | .004 |
| Prostate | 0.74 | 1.04 | - | 0.73 | 0.59 | 0.89 | 1 | 1.54 | 0.83 | 0.66 | 0.72 | 0.92 | .002 |
| Testis | 0.81 | 0.95 | - | 0.86 | 0.67 | 0.81 | 1 | 0.18 | 0.45 | 0.29 | 0.46 | 0.48 | .046 |
| Other male cancers | 0.93 | 1.02 | - | 1.13 | 0.53 | 1.10 | 1 | 1.09 | 1.73 | 0.92 | 0.89 | 1.01 | .000 |
| Baladder | 0.92 | 1.04 | 0.25 | 1.36 | 0.50 | 0.81 | 1 | 0.46 | 0.50 | 0.54 | 0.47 | 0.70 | .000 |
| Kidney (Renal) | 0.96 | 0.99 | 0.52 | 0.86 | 0.42 | 1.12 | 1 | 0.84 | 0.90 | 0.74 | 1.02 | 0.82 | .012 |
| Other urinary track | 0.77 | 1.02 | 0.48 | 1.28 | 0.36 | 0.77 | 1 | 0.55 | 0.56 | 1.10 | 0.50 | 0.80 | .000 |
| Brain | 0.70 | 0.96 | 0.77 | 0.48 | 0.34 | 0.53 | 1 | 0.55 | 0.71 | 0.87 | 0.69 | 0.95 | .032 |
| Thyroid | 0.80 | 0.97 | 1.96 | 0.53 | 0.38 | 0.95 | 1 | 0.55 | 1.01 | 1.62 | 0.79 | 0.93 | 0.15 |
| Hodgkin | 0.80 | 0.96 | 0.76 | 0.58 | 0.41 | 0.57 | 1 | 0.58 | 0.76 | 0.46 | 0.56 | 0.79 | .020 |
| Non-Hodgkin | 0.77 | 0.99 | 0.72 | 0.56 | 0.39 | 0.61 | 1 | 0.54 | 0.84 | 0.94 | 0.65 | 0.81 | .019 |
| Leukemia | 0.82 | 1.00 | 0.61 | 0.50 | 0.39 | 0.61 | 1 | 0.64 | 0.67 | 0.69 | 0.57 | 0.86 | .008 |
| Multiple myeloma | 0.74 | 0.99 | 0.69 | 0.39 | 0.26 | 0.55 | 1 | 2.03 | 1.13 | 0.97 | 0.90 | 1.08 | .006 |
| Other unspecified | 0.73 | 0.99 | 0.78 | 0.84 | 0.66 | 0.73 | 1 | 0.71 | 0.75 | 0.83 | 0.72 | 0.85 | .006 |
| Secondary malignancies | 0.68 | 0.98 | 0.92 | 0.79 | 0.47 | 0.47 | 1 | 1.03 | 0.88 | 1.36 | 0.76 | 0.92 | .200 |
| Neoplasms unspecified | 0.87 | 1.02 | 0.84 | 1.11 | 0.94 | 0.83 | 1 | 0.85 | 0.86 | 1.08 | 0.74 | 0.94 | .003 |
| *Gray cells indicate P > 0.05* | | | | | | | | | | | | | |

| **Table S3** Multivariable logistic regression of association (Odds Ratio) between diabetes and cancers as the 1st diagnosis (reason of admission) adjusted by age, sex, race, smoking, alcohol and obesity in hospitalized inpatient in US, 2005-2015 | | | | | | | | | | | | | |
| --- | --- | --- | --- | --- | --- | --- | --- | --- | --- | --- | --- | --- | --- |
| **Predictors**  **Cancers** | **All Diadetes** | Age | Sex | Smoking | Alcohol | Obesity | Race | | | | | | Cons. |
| White | Black | Hispanic | Asian or Pacific | Native American | Other |
| Head and neck | 0.50 | 0.98 | 0.39 | 1.09 | 1.34 | 0.45 | 1 | 0.95 | 0.91 | 1.22 | 0.83 | 1.09 | .031 |
| Esophagus | 0.59 | 0.98 | 0.27 | 1.12 | 1.22 | 0.47 | 1 | 1.03 | 0.81 | 0.99 | 1.06 | 0.82 | .002 |
| Stomach | 0.69 | 0.99 | 0.47 | 0.81 | 0.66 | 0.61 | 1 | 1.64 | 2.21 | 4.49 | 1.26 | 1.83 | .001 |
| Colon | 0.71 | 1.00 | 0.88 | 0.75 | 0.54 | 0.96 | 1 | 1.03 | 0.93 | 1.41 | 0.87 | 1.00 | .003 |
| Rectum and anus | 0.60 | 0.97 | 0.63 | 0.87 | 0.51 | 0.78 | 1 | 0.77 | 1.07 | 1.76 | 1.02 | 1.04 | .010 |
| Liver, intrahepatic | 1.07 | 0.97 | 0.46 | 0.83 | 3.01 | 0.54 | 1 | 1.28 | 2.15 | 5.57 | 1.25 | 1.75 | .004 |
| Pancreas | 1.39 | 0.99 | 0.90 | 0.92 | 0.77 | 0.45 | 1 | 0.98 | 0.94 | 1.39 | 0.66 | 1.09 | .002 |
| GI peritoneum | 0.70 | 0.98 | 1.10 | 0.59 | 0.54 | 0.77 | 1 | 0.94 | 1.26 | 1.79 | 1.11 | 1.28 | .002 |
| Lung, Bronchus | 0.65 | 0.99 | 0.80 | 2.36 | 0.60 | 0.54 | 1 | 0.90 | 0.62 | 1.24 | 0.66 | 0.83 | .009 |
| Other respiratory tissue | 0.58 | 1.00 | 0.26 | 0.68 | 0.27 | 0.47 | 1 | 0.47 | 0.67 | 0.75 | 0.49 | 1.21 | .000 |
| Bone tissue | 0.55 | 0.97 | 0.72 | 0.60 | 0.39 | 0.75 | 1 | 0.80 | 1.03 | 1.47 | 0.90 | 1.17 | .003 |
| Skin, Melanomas | 0.61 | 0.99 | 0.52 | 0.43 | 0.29 | 0.84 | 1 | 0.19 | 0.53 | 0.40 | 0.50 | 0.66 | .000 |
| Skin, non-epithelial | 0.69 | 1.01 | 0.41 | 1.09 | 0.67 | 0.74 | 1 | 0.33 | 0.62 | 0.44 | 0.81 | 0.86 | .000 |
| Breast | 0.54 | 0.95 | - | 0.48 | 0.20 | 0.62 | 1 | 0.93 | 0.89 | 1.54 | 0.77 | 1.03 | .157 |
| Uterus | 0.70 | 0.96 | - | 0.35 | 0.17 | 2.35 | 1 | 0.75 | 0.85 | 1.51 | 0.81 | 1.17 | .048 |
| Cervix | 0.50 | 0.93 | - | 1.05 | 0.32 | 0.67 | 1 | 1.40 | 2.47 | 3.17 | 1.22 | 1.75 | .070 |
| Ovary | 0.47 | 0.96 | - | 0.50 | 0.27 | 0.67 | 1 | 0.59 | 0.92 | 1.37 | 0.80 | 1.04 | .042 |
| Other female cancers | 0.72 | 0.98 | - | 1.06 | 0.35 | 0.86 | 1 | 0.61 | 0.83 | 0.84 | 0.69 | 1.05 | .001 |
| Prostate | 0.38 | 0.95 | - | 0.45 | 0.14 | 0.70 | 1 | 0.99 | 0.82 | 0.83 | 0.74 | 1.10 | .266 |
| Testis | 0.47 | 0.90 | - | 0.77 | 0.33 | 0.74 | 1 | 0.49 | 1.8 | 0.69 | 0.45 | 0.63 | .022 |
| Other male cancers | 0.84 | 0.99 | - | 1.31 | 0.24 | 1.27 | 1 | 0.96 | 2.04 | 1.59 | 1.38 | 1.11 | .000 |
| Baladder | 0.74 | 1.02 | 0.25 | 1.46 | 0.41 | 0.79 | 1 | 0.58 | 0.68 | 0.74 | 0.53 | 0.91 | .000 |
| Kidney (Renal) | 0.78 | 0.93 | 0.52 | 0.83 | 0.28 | 1.24 | 1 | 0.72 | 0.96 | 0.93 | 0.94 | 0.92 | .018 |
| Other urinary track | 0.69 | 1.02 | 0.48 | 1.60 | 0.28 | 0.87 | 1 | 0.43 | 0.58 | 1.29 | 0.58 | 0.88 | .000 |
| Brain | 0.67 | 0.96 | 0.73 | 0.53 | 0.38 | 0.54 | 1 | 0.47 | 0.73 | 0.85 | 0.61 | 0.98 | .060 |
| Thyroid | 0.60 | 0.94 | 1.92 | 0.32 | 0.12 | 0.68 | 1 | 0.55 | 1.47 | 2.78 | 0.87 | 1.28 | .030 |
| Hodgkin | 0.69 | 0.96 | 0.66 | 0.62 | 0.33 | 0.47 | 1 | 0.87 | 1.74 | 0.80 | 0.92 | 1.01 | .001 |
| Non-Hodgkin | 0.69 | 0.98 | 0.70 | 0.54 | 0.36 | 0.57 | 1 | 0.59 | 109 | 1.32 | 0.68 | 1.00 | .005 |
| Leukemia | 0.66 | 0.98 | 0.65 | 0.48 | 0.36 | 0.55 | 1 | 0.77 | 0.91 | 1.10 | 0.65 | 1.14 | .004 |
| Multiple myeloma | 0.60 | 0.97 | 0.70 | 0.36 | 0.23 | 0.49 | 1 | 1.91 | 1.22 | 1.07 | 0.96 | 1.26 | .006 |
| Other unspecified | 0.60 | 0.97 | 1.04 | 0.91 | 0.43 | 0.67 | 1 | 0.82 | 0.92 | 1.58 | 1.02 | 1.05 | .001 |
| Secondary malignancies | 0.64 | 0.97 | 1.05 | 0.77 | 0.44 | 0.45 | 1 | 0.97 | 0.88 | 1.30 | 0.72 | 0.89 | .061 |
| Neoplasms unspecified | 0.72 | 0.99 | 0.85 | 0.81 | 0.49 | 0.73 | 1 | 0.95 | 10.7 | 1.30 | 0.74 | 1.13 | .002 |
| *Gray cells indicate P > 0.05* | | | | | | | | | | | | | |

| **Table S4** Multivariable logistic regression of association (Odds Ratio) between diabetes and cancers as the 2nd to 30th diagnosis (as comorbity) adjusted by age, sex, race, smoking, alcohol and obesity in hospitalized inpatient in US, 2005-2015 | | | | | | | | | | | | | |
| --- | --- | --- | --- | --- | --- | --- | --- | --- | --- | --- | --- | --- | --- |
| **Predictors**  **Cancers** | **All Diadetes** | Age | Sex | Smoking | Alcohol | Obesity | Race | | | | | | Cons. |
| White | Black | Hispanic | Asian or Pacific | Native American | Other |
| Head and neck | 0.59 | 0.98 | 0.35 | 1.02 | 1.16 | 0.36 | 1 | 0.92 | 0.72 | 1.00 | 0.71 | 0.83 | .021 |
| Esophagus | 0.67 | 0.99 | 0.27 | 0.77 | 0.89 | 0.33 | 1 | 0.76 | 0.60 | 0.69 | 0.74 | 0.66 | .006 |
| Stomach | 0.73 | 1.00 | 0.55 | 0.72 | 0.60 | 0.40 | 1 | 1.84 | 2.03 | 4.17 | 1.26 | 1.67 | .001 |
| Colon | 0.94 | 1.03 | 0.80 | 0.76 | 0.68 | 0.79 | 1 | 1.02 | 0.83 | 0.99 | 0.81 | 0.86 | .002 |
| Rectum and anus | 0.70 | 0.98 | 0.77 | 0.79 | 0.47 | 0.55 | 1 | 0.78 | 0.8 | 1.24 | 0.79 | 0.88 | .014 |
| Liver, intrahepatic | 1.25 | 0.97 | 0.46 | 0.68 | 0.49 | 0.46 | 1 | 1.10 | 1.98 | 3.94 | 1.27 | 1.52 | .015 |
| Pancreas | 1.43 | 0.98 | 0.82 | 0.62 | 0.50 | 0.30 | 1 | 1.00 | 0.84 | 1.24 | 0.65 | 0.92 | .006 |
| GI peritoneum | 1.06 | 0.99 | 0.99 | 0.60 | 0.55 | 0.47 | 1 | 0.89 | 1.04 | 1.52 | 0.78 | 0.95 | .003 |
| Lung, Bronchus | 0.75 | 1.00 | 0.79 | 1.52 | 0.57 | 0.45 | 1 | 0.85 | 0.50 | 0.87 | 0.68 | 0.68 | .022 |
| Other respiratory tissue | 0.64 | 1.00 | 0.50 | 0.90 | 0.74 | 0.50 | 1 | 0.62 | 0.72 | 1.04 | 0.60 | 0.76 | .000 |
| Bone tissue | 0.61 | 0.96 | 0.73 | 0.47 | 0.37 | 0.53 | 1 | 0.89 | 1.08 | 1.31 | 0.71 | 0.95 | .009 |
| Skin, Melanomas | 0.73 | 1.00 | 0.58 | 0.69 | 0.62 | 1.01 | 1 | 0.06 | 0.23 | 0.12 | 0.31 | 0.43 | .004 |
| Skin, non-epithelial | 0.79 | 1.03 | 0.58 | 0.99 | 0.82 | 1.13 | 1 | 0.06 | 0.26 | 0.14 | 0.28 | 0.44 | .001 |
| Breast | 0.89 | 1.00 | - | 0.74 | 0.76 | 0.82 | 1 | 0.81 | 0.65 | 0.75 | 0.65 | 0.79 | .035 |
| Uterus | 1.01 | 0.99 | - | 0.71 | 0.55 | 1.51 | 1 | 0.70 | 0.75 | 0.65 | 0.68 | 0.78 | .009 |
| Cervix | 0.80 | 0.96 | - | 1.52 | 0.77 | 0.87 | 1 | 0.87 | 1.04 | 1.08 | 0.89 | 0.90 | .047 |
| Ovary | 0.66 | 0.97 | - | 0.55 | 0.40 | 0.66 | 1 | 0.58 | 0.76 | 1.01 | 0.75 | 0.79 | .05 |
| Other female cancers | 0.91 | 0.99 | - | 1.17 | 0.69 | 0.96 | 1 | 0.63 | 0.69 | 0.63 | 0.77 | 0.78 | .003 |
| Prostate | 0.83 | 1.06 | - | 0.82 | 0.73 | 0.95 | 1 | 1.63 | 0.83 | 0.64 | 0.73 | 0.88 | .000 |
| Testis | 0.82 | 0.95 | - | 0.86 | 0.68 | 0.81 | 1 | 0.18 | 0.44 | 0.28 | 0.46 | 0.48 | .043 |
| Other male cancers | 0.96 | 1.02 | - | 1.08 | 0.60 | 1.06 | 1 | 1.11 | 1.67 | 0.84 | 0.77 | 1.02 | .000 |
| Baladder | 0.96 | 1.04 | 0.25 | 1.34 | 0.53 | 0.82 | 1 | 0.44 | 0.47 | 0.50 | 0.45 | 0.66 | .000 |
| Kidney (Renal) | 1.02 | 1.00 | 0.52 | 0.87 | 0.47 | 1.08 | 1 | 0.88 | 0.87 | 0.68 | 1.05 | 0.78 | .005 |
| Other urinary track | 0.82 | 1.02 | 0.48 | 1.12 | 0.41 | 0.73 | 1 | 0.61 | 0.55 | 1.01 | 0.46 | 0.76 | .000 |
| Brain | 0.70 | 0.96 | 0.77 | 0.48 | 0.34 | 0.53 | 1 | 0.55 | 0.71 | 0.87 | 0.69 | 0.95 | .032 |
| Thyroid | 0.87 | 0.98 | 1.96 | 0.61 | 0.48 | 1.04 | 1 | 0.55 | 0.88 | 1.29 | 0.77 | 0.83 | .006 |
| Hodgkin | 0.81 | 0.96 | 0.77 | 0.58 | 0.42 | 0.58 | 1 | 0.5 | 0.70 | 0.44 | 0.53 | 0.77 | .019 |
| Non-Hodgkin | 0.79 | 0.99 | 0.72 | 0.56 | 0.40 | 0.62 | 1 | 0.53 | 0.80 | 0.87 | 0.64 | 0.87 | .015 |
| Leukemia | 0.85 | 1.00 | 0.61 | 0.50 | 0.40 | 0.62 | 1 | 0.62 | 0.62 | 0.63 | 0.56 | 0.82 | .005 |
| Multiple myeloma | 0.78 | 1.00 | 0.69 | 0.40 | 0.27 | 0.57 | 1 | 2.05 | 1.11 | 0.95 | 0.89 | 1.04 | .003 |
| Other unspecified | 0.74 | 0.99 | 0.76 | 0.83 | 0.68 | 0.74 | 1 | 0.70 | 0.74 | 0.77 | 0.70 | 0.83 | .005 |
| Secondary malignancies | 0.68 | 0.98 | 0.92 | 0.74 | 0.48 | 0.47 | 1 | 1.04 | 0.89 | 1.38 | 0.76 | 0.93 | .175 |
| Neoplasms unspecified | 0.90 | 1.02 | 0.83 | 1.17 | 1.03 | 0.85 | 1 | 0.84 | 0.83 | 1.05 | 0.74 | 0.91 | .002 |
| *Gray cells indicate P > 0.05* | | | | | | | | | | | | | |
