# Supplementary material for: Association of Diabetes and Cancers: An analysis of the Healthcare Cost and Utilization Project National Inpatient Sample (HCUP-NIS) 2005-2015 Dataset
Source: Research Square preprint supplement (doi:10.21203/rs.3.rs-7414347/v1), 2025-09-17
Supplement: Supplementary file 2 [file 8d6bf893039de0bd278a2c56.docx]

**Supplementary file 1**

| **Table S1** Univariate comparison of prevalence of cancers between diabetic and non-diabetic hospitalized inpatients ≥50 years in United States, 2005-15 | | | | | | | | | | | | | | | |
| --- | --- | --- | --- | --- | --- | --- | --- | --- | --- | --- | --- | --- | --- | --- | --- |
| **Cancers** | **Frequency and prevalence of cancers that admitted as 1st diagnosis among:** | | | | | **Frequency and prevalence of cancers that diagnosed as 2nd to 30th among:** | | | | | **Frequency and prevalence of cancers that diagnosed as 1st to 30th among:** | | | | |
| **Non-Diabetic patients**  *(n= 31,300,080)* | | **All Diabetic patients**  *(n= 13,048,961)* | | **Measure of associaton (diabetic/non-diabetic**  **(Prevalence Ratio)** | **Non-Diabetic patients**  *(n= 31,300,080)* | | **All Diabetic patients**  *(n= 13,048,961)* | | **Measure of associaton (diabetic/non-diabetic**  **(Prevalence Ratio)** | **Non-Diabetic patients**  *(n= 31,300,080)* | | **All Diabetic patients**  *(n= 13,048,961)* | | **Measure of associaton (diabetic/non-diabetic**  **(Prevalence Ratio)** |
| **No.** | % | **No.** | **%** | **No.** | % | **No.** | **%** | **No.** | % | **No.** | **%** |
| Head and neck | 55,304 | 0.18 | 9,828 | 0.08 | 0.50 | 187,574 | 0.60 | 42,541 | 0.33 | 0.57 | 242,878 | 0.78 | 52,369 | 0.40 | 0.52 |
| Esophagus | 20,917 | 0.07 | 4,844 | 0.04 | 0.57 | 71,087 | 0.23 | 18,248 | 0.14 | 0.64 | 92,004 | 0.29 | 23,092 | 0.18 | 0.60 |
| Stomach | 35,305 | 0.11 | 10,635 | 0.08 | 0.73 | 62,833 | 0.20 | 19,403 | 0.15 | 0.79 | 98,138 | 0.31 | 30,038 | 0.23 | 0.73 |
| Colon | 156,978 | 0.50 | 45,319 | 0.35 | 0.71 | 584,369 | 1.87 | 207,186 | 1.59 | 0.90 | 741,347 | 2.37 | 252,505 | 1.94 | 0.82 |
| Rectum and anus | 64,975 | 0.21 | 15,926 | 0.12 | 0.60 | 135,696 | 0.43 | 36,473 | 0.28 | 0.67 | 200,671 | 0.64 | 52,399 | 0.40 | 0.63 |
| Liver, intrahepatic | 29,722 | 0.09 | 12,681 | 0.10 | 1.11 | 69,348 | 0.22 | 33,481 | 0.26 | 1.24 | 99,070 | 0.32 | 46,162 | 0.35 | 1.12 |
| Pancreas | 50,412 | 0.16 | 26,050 | 0.20 | 1.33 | 71,406 | 0.23 | 37,489 | 0.29 | 1.38 | 121,818 | 0.39 | 63,539 | 0.49 | 1.25 |
| GI peritoneum | 31,579 | 0.10 | 9,080 | 0.07 | 0.70 | 63,016 | 0.20 | 25,440 | 0.19 | 1.00 | 94,595 | 0.30 | 34,520 | 0.26 | 0.88 |
| Lung, Bronchus | 239,448 | 0.77 | 57,824 | 0.44 | 0.59 | 717,162 | 2.29 | 199,225 | 1.53 | 0.69 | 956,610 | 3.06 | 257,049 | 1.97 | 0.64 |
| Other respiratory tissue | 4,014 | 0.01 | 907 | 0.01 | 1.00 | 8,855 | 0.03 | 2,143 | 0.02 | 0.67 | 12,869 | 0.04 | 3,050 | 0.02 | 0.57 |
| Bone tissue | 16,054 | 0.05 | 3,674 | 0.03 | 0.60 | 25,170 | 0.08 | 6,129 | 0.05 | 0.63 | 41,224 | 0.13 | 9,803 | 0.08 | 0.57 |
| Skin, Melanomas | 5,397 | 0.02 | 1,301 | 0.01 | 0.50 | 158,077 | 0.51 | 42,920 | 0.33 | 0.69 | 163,474 | 0.52 | 44,221 | 0.34 | 0.65 |
| Skin, non-epithelial | 9,862 | 0.03 | 2,631 | 0.02 | 0.64 | 365,205 | 1.17 | 104,044 | 0.80 | 0.68 | 375,067 | 1.20 | 106,375 | 0.82 | 0.68 |
| Breast | 106,532 | 0.34 | 22,519 | 0.33 | 0.54 | 1,018,662 | 3.25 | 326,820 | 4.80 | 0.84 | 1,125,194 | 3.59 | 349,339 | 2.68 | 0.74 |
| Uterus | 53,380 | 0.17 | 17,438 | 0.26 | 0.87 | 143,602 | 0.46 | 56,495 | 0.83 | 1.05 | 196,982 | 0.63 | 73,933 | 0.57 | 0.90 |
| Cervix | 13,556 | 0.04 | 2,745 | 0.04 | 0.50 | 93,889 | 0.30 | 28,042 | 0.41 | 0.79 | 107,445 | 0.34 | 30,787 | 0.24 | 0.69 |
| Ovary | 37,745 | 0.12 | 6,651 | 0.10 | 0.45 | 132,750 | 0.42 | 31,857 | 0.47 | 0.63 | 170,495 | 0.54 | 38,508 | 0.30 | 0.54 |
| Other female cancers | 9,603 | 0.03 | 2,603 | 0.04 | 0.80 | 33,915 | 0.11 | 11,145 | 0.16 | 0.84 | 43,518 | 0.14 | 13,748 | 0.11 | 0.76 |
| Prostate | 153,824 | 0.49 | 25,546 | 0.41 | 0.38 | 874,626 | 2.79 | 300,551 | 4.82 | 0.82 | 1,028,450 | 3.29 | 326,097 | 2.50 | 0.76 |
| Testis | 335 | 0.00 | 59 | 0.00 | - | 17,978 | 0.06 | 5,565 | 0.09 | 0.75 | 18,313 | 0.06 | 5,624 | 0.04 | 0.74 |
| Other male cancers | 1,306 | 0.00 | 502 | 0.01 | 1.00 | 5,665 | 0.02 | 2,381 | 0.04 | 1.00 | 6,971 | 0.02 | 2,883 | 0.02 | 0.99 |
| Baladder | 57,260 | 0.18 | 16,550 | 0.13 | 0.72 | 274,168 | 0.88 | 96,330 | 0.74 | 0.89 | 331,428 | 1.06 | 112,880 | 0.87 | 0.82 |
| Kidney (Renal) | 65,512 | 0.21 | 21,641 | 0.17 | 0.85 | 195,464 | 0.62 | 79,166 | 0.61 | 1.05 | 260,976 | 0.83 | 100,807 | 0.77 | 0.93 |
| Other urinary track cancers | 5,920 | 0.02 | 1,581 | 0.01 | 0.50 | 11,533 | 0.04 | 3,513 | 0.03 | 0.75 | 17,453 | 0.06 | 5,094 | 0.04 | 0.70 |
| Brain | 40,155 | 0.13 | 9,829 | 0.08 | 0.62 | 44,558 | 0.14 | 11,893 | 0.09 | 0.64 | 84,713 | 0.27 | 21,722 | 0.17 | 0.62 |
| Thyroid | 22,441 | 0.07 | 5,426 | 0.04 | 0.57 | 71,007 | 0.23 | 24,126 | 0.18 | 0.82 | 93,448 | 0.30 | 29,552 | 0.23 | 0.76 |
| Hodgkin | 2,649 | 0.01 | 755 | 0.01 | 1.00 | 29,987 | 0.10 | 9,134 | 0.07 | 0.78 | 32,636 | 0.10 | 9,889 | 0.08 | 0.73 |
| Non-Hodgkin | 58,332 | 0.19 | 15,918 | 0.12 | 0.67 | 325,104 | 1.04 | 98,001 | 0.75 | 0.76 | 383,436 | 1.23 | 113,919 | 0.87 | 0.71 |
| Leukemia | 46,467 | 0.15 | 12,080 | 0.09 | 0.64 | 250,737 | 0.80 | 80,303 | 0.62 | 0.82 | 297,204 | 0.95 | 92,383 | 0.71 | 0.75 |
| Multiple myeloma | 29,380 | 0.09 | 7,327 | 0.06 | 0.67 | 124,969 | 0.40 | 39,437 | 0.30 | 0.79 | 154,349 | 0.49 | 46,764 | 0.36 | 0.73 |
| Other unspecified | 7,986 | 0.03 | 1,920 | 0.01 | 0.50 | 86,813 | 0.28 | 24,828 | 0.19 | 0.70 | 94,799 | 0.30 | 26,748 | 0.20 | 0.68 |
| Secondary malignancies | 335,115 | 1.07 | 83,144 | 0.64 | 0.62 | 1,318,051 | 4.21 | 351,928 | 2.70 | 0.66 | 1,653,166 | 5.28 | 435,072 | 3.33 | 0.63 |
| Neoplasms unspecified | 60,616 | 0.19 | 17,703 | 0.14 | 0.74 | 344,009 | 1.10 | 116,019 | 0.89 | 0.86 | 404,625 | 1.29 | 133,722 | 1.02 | 0.79 |
| *Gray cells indicate P > 0.05* | | | | | | | | | | | | | | | |
