# Supplementary material for: Association of Diabetes and Cancers: An analysis of the Healthcare Cost and Utilization Project National Inpatient Sample (HCUP-NIS) 2005-2015 Dataset
Source: Research Square preprint supplement (doi:10.21203/rs.3.rs-7414347/v1), 2025-09-17
Supplement: Supplementary file 3 [file ba2405c52d73937e2a3f0b64.docx]

**Supplementart file 3**

| **Table S5.** Prevalence of selected cancers (per 1,000) amongst hospitalized patients aged ≥50 years in the United States, 2005–15 | | | | | | | | | | | | |
| --- | --- | --- | --- | --- | --- | --- | --- | --- | --- | --- | --- | --- |
| **Cancer/Cancer group** | **Year** | | | | | | | | | | | **11-year Average** |
| **2005** | **2006** | **2007** | **2008** | **2009** | **2010** | **2011** | **2012** | **2013** | **2014** | **2015** |
| Head and neck | 5.4 | 5.4 | 5.7 | 5.8 | 6.4 | 6.8 | 6.3 | 6.7 | 6.8 | 6.9 | 6.8 | 6.3 |
| Esophagus | 2.3 | 2.2 | 2.4 | 2.3 | 2.6 | 2.6 | 2.6 | 2.6 | 2.7 | 2.7 | 2.7 | 2.5 |
| Stomach | 2.7 | 2.5 | 2.8 | 2.7 | 2.7 | 2.9 | 2.8 | 2.9 | 2.9 | 2.9 | 2.8 | 2.8 |
| Colon | 21.3 | 20.8 | 21.4 | 20.9 | 21.9 | 21.3 | 22.2 | 21.9 | 21.7 | 21.5 | 20.8 | 21.4 |
| Rectum and anus | 5.1 | 4.9 | 5.4 | 5.2 | 5.5 | 5.5 | 5.7 | 5.7 | 5.8 | 6.2 | 6.1 | 5.6 |
| Liver, intrahepatic | 2 | 2 | 2.4 | 2.9 | 3 | 3.2 | 3.3 | 3.6 | 3.9 | 4.1 | 4.2 | 3.1 |
| Pancreas | 3.3 | 3.3 | 3.7 | 3.9 | 3.8 | 4.1 | 4.2 | 4.2 | 4.4 | 4.6 | 4.5 | 4 |
| GI peritoneum | 2.3 | 2.2 | 2.5 | 2.7 | 2.6 | 2.9 | 3 | 3 | 3.1 | 3.2 | 3.2 | 2.8 |
| Lung, Bronchus | 25.5 | 24.7 | 26.2 | 25.7 | 26.8 | 26.8 | 27.1 | 27.4 | 27.4 | 27.4 | 26.7 | 26.5 |
| Other respiratory tissue | 0.3 | 0.3 | 0.4 | 0.3 | 0.3 | 0.4 | 0.4 | 0.4 | 0.4 | 0.4 | 0.3 | 0.4 |
| Bone tissue | 0.9 | 0.9 | 1.1 | 1.2 | 1 | 1.2 | 1.1 | 1.2 | 1.2 | 1.3 | 1.2 | 1.1 |
| Skin, melanomas | 3 | 3.1 | 3.6 | 3.9 | 4.3 | 4.8 | 5 | 5.1 | 5.4 | 5.8 | 6.2 | 4.6 |
| Skin, non-epithelial | 5.6 | 5.9 | 7 | 7.8 | 9.9 | 11 | 11.6 | 12.6 | 13.6 | 15.1 | 16.2 | 10.6 |
| Breast | 28.6 | 28.1 | 29.9 | 30.3 | 32.5 | 33.2 | 34.7 | 35 | 34.6 | 34.4 | 34.1 | 32.3 |
| Uterus | 5.3 | 5 | 5.3 | 5.5 | 5.9 | 5.9 | 6.2 | 6.4 | 6.3 | 6.4 | 6.5 | 5.9 |
| Cervix | 2.5 | 2.5 | 2.7 | 2.7 | 3.1 | 3.2 | 3.2 | 3.3 | 3.3 | 3.4 | 3.4 | 3 |
| Ovary | 4.4 | 4.1 | 4.5 | 4.6 | 4.6 | 4.7 | 4.6 | 4.7 | 4.8 | 4.8 | 4.7 | 4.6 |
| Other female cancers | 1.1 | 1 | 1.1 | 1.1 | 1.2 | 1.3 | 1.3 | 1.4 | 1.4 | 1.3 | 1.3 | 1.2 |
| Prostate | 25.1 | 25.9 | 27.8 | 28.5 | 30.4 | 30.1 | 32.3 | 31.4 | 31.1 | 30.9 | 30.7 | 29.5 |
| Testis | 0.3 | 0.4 | 0.4 | 0.4 | 0.5 | 0.5 | 0.6 | 0.6 | 0.6 | 0.7 | 0.7 | 0.5 |
| Other male cancers | 0.2 | 0.2 | 0.2 | 0.2 | 0.2 | 0.2 | 0.2 | 0.2 | 0.2 | 0.3 | 0.2 | 0.2 |
| Bladder | 8 | 8.2 | 8.7 | 8.8 | 9.5 | 9.7 | 10.3 | 10.4 | 10.5 | 10.7 | 10.6 | 9.6 |
| Kidney (Renal) | 5.8 | 5.9 | 6.8 | 7.1 | 7.7 | 8 | 8.6 | 8.6 | 8.9 | 9.1 | 9.2 | 7.8 |
| Other urinary track | 0.4 | 0.4 | 0.4 | 0.5 | 0.5 | 0.5 | 0.5 | 0.5 | 0.5 | 0.6 | 0.7 | 0.5 |
| Brain | 1.1 | 1 | 1.1 | 1.1 | 1.2 | 1.3 | 1.3 | 1.4 | 1.4 | 1.4 | 1.4 | 1.2 |
| Thyroid | 1.9 | 2 | 2.3 | 2.5 | 2.5 | 2.8 | 3 | 3.1 | 3.1 | 3.2 | 3.2 | 2.7 |
| Hodgkin | 0.8 | 0.8 | 0.9 | 0.9 | 0.9 | 0.9 | 1 | 1 | 1 | 1 | 1 | 0.9 |
| Non-Hodgkin | 9.3 | 9.2 | 10.3 | 10.2 | 10.4 | 11 | 11.2 | 11.5 | 11.7 | 11.9 | 11.8 | 10.8 |
| Leukemia | 7.1 | 7.2 | 7.9 | 8.1 | 8.3 | 8.4 | 8.7 | 9.1 | 9.5 | 9.5 | 9.3 | 8.5 |
| Multiple myeloma | 3.9 | 3.6 | 4 | 4.1 | 4.1 | 4.3 | 4.5 | 4.6 | 4.8 | 4.9 | 4.9 | 4.3 |
| Other unspecified | 1.8 | 1.8 | 2.1 | 2.3 | 2.4 | 2.9 | 2.9 | 3.1 | 3.3 | 3.5 | 3.4 | 2.7 |
| Secondary malignancies | 41.1 | 38.8 | 43 | 41.5 | 40.9 | 42.7 | 41.2 | 42 | 42.2 | 42.6 | 40.9 | 41.5 |
| Neoplasms unspecified | 8.1 | 8.5 | 10.6 | 11.1 | 11.9 | 12.1 | 12.7 | 12.8 | 12.9 | 13.4 | 13.5 | 11.6 |

**Figure S1.** Trend of diabetes prevalence amongst hospitalized patients aged ≥50 years in the United States, 2005–15
